# Supplementary material
Source: publisher figshare collection journal article supplement (https://acs.figshare.com/ndownloader/files/25103537)
Supplement: Supplementary file 1 [file 25103537]

## Sheet: Supplementary Data 3
Supplementary Data 3
			Hypothesis statistics					F-test for equal vars		t-test for equal means
Hypothesis	Accept [A], Reject [R], Not Testable [NT]	Dataset / filters	R2	MC	error.mean	error.var	Count.Nan	F	p-val	t-stat	p-val	Notes
NULL (RBS Calculator using PyVRNA, Andronescu2007.par)	-	1014IC	0.719303	7139	3.10919	6.67616	23	-	-	-	-	Unless otherwise stated in Notes, the reference model was RBS Calculator using PyVRNA and Andronescu2007.par
An empirical model of SD:aSD hybridization with spacing penalty only	R	Escherichia coli	0.391568	3052.8	5.42363	59.7804	0	8.99202	5.33035e-223	2.57775	0.0100186	EMOPEC compared against v2.1 with all changes
A biophysical model of SD:aSD hybridization with spacing penalty only	R	1014IC	0.535515	4994.2	3.12841	22.0522	23	3.31704	3.65777e-75	0.0615085	0.950962
A biophysical model of structure unfolding and refolding only	R	1014IC	0.437003	2944.4	4.62748	41.033	23	6.17209	4.62107e-159	1.60378	0.108926
Two pathways of translation initation described as "direct' and "indirect"	R	1014IC	0.497004	4489.6	839.192	88.365	23	13.2916	1.37425e-289	2.15959	0.0310548	UTR Designer compared against v2.1 with all changes
Transient unfolding of RNA structure at RBS required before the 30S ribosome can bind	R	1014IC	0.555897	2385.2	3.46059	15.8043	23	2.37724	3.66466e-40	0.456375	0.64818	RBS Designer compared against v2.1 with all changes
Active unfolding of RNA structure at RBS mediated by S1 helicase	A	Escherichia coli	-	-	-	-	-	-	-	-	-	Demonstrated by rejection of "A biophysical model of SD:aSD: hybridization with a spacing penalty only" in favor of RBS Calculator v2.1
Downstream box (DB) on mRNA (all 15 bp windows within the first 35 nt of the CDS) binds to anti-DB of 16S rRNA (5'-CUUUGUGAUUGAUGA-3', 1469-1483) to increase the local concentration of the 30S ribosome and the overall rate of translation initiation	NT	Escherichia coli	0.71321	2860.8	2.93135	7.57503	23	1.04841	0.260051	0.133248	0.894016	(Sprengart, Fuchs, and Porter, EMBO Journal 1996)
Downstream box (DB) on mRNA (all 15 bp windows within the first 35 nt of the CDS) binds to anti-DB of 16S rRNA (5'-CACUUUGUGAUUCAU-3', 1467-1481) to increase the local concentration of the 30S ribosome and the overall rate of translation initiation	NT	Escherichia coli	0.715945	2860.8	3.20821	7.47732	23	1.03489	0.320408	0.481972	0.629905	(Etchegaray & Inouye, Journal of Biological Chemistry 1999)
Downstream box (DB) on mRNA (all 15 bp windows in the 5'UTR through 35 nt of the CDS) binds to anti-DB of 16S rRNA (5'-CUUUGUGAUUGAUGA-3', 1469-1483) to increase the local concentration of the 30S ribosome and the overall rate of translation initiation	NT	Escherichia coli	0.699658	2860.8	2.96814	8.64023	23	1.19584	0.00751234	0.195357	0.84514
Downstream box (DB) on mRNA (all 15 bp windows in the 5'UTR through 35 nt of the CDS) binds to anti-DB of 16S rRNA (5'-CACUUUGUGAUUCAU-3', 1467-1481) to increase the local concentration of the 30S ribosome and the overall rate of translation initiation	NT	Escherichia coli	0.711327	2860.8	3.02964	7.90529	23	1.09412	0.110541	0.281085	0.778685
Noncanonical start codons can initiate translation	A	1014IC	0.730463	7857.4	2.50948	6.18509	0	0.926444	0.113368	-0.753893	0.451035
Noncanonical start codons can initiate translation	A	Hecht 2017	0.972314	16.1	1.37447	1.44215	0	0.078877	4.7477e-09	-0.476377	0.638989
The anti-SD does not bind the mRNA when the hybridization free energy is positve	R	1014IC	0.711045	3028.9	2.896	6.99908	23	1.04837	0.228774	-0.252464	0.800713
Positive SD:aSD hybridization does not occur, but translation initiation can occur from that configuration	R	1014IC	0.715067	3028.9	2.96992	7.33182	23	1.09821	0.0703561	-0.176654	0.859805
RNA centroid structure is more predictive than the RNA mfe structure	R	1014IC	0.575763	1899.3	13.0611	31.2508	23	4.68095	1.77441e-119	1.12439	0.261115
Maximum allowed size of RNA hairpins is 25 (see Note)	R	1014IC	0.672699	2512.4	3.9114	8.99283	23	1.34701	1.4587e-06	0.573086	0.566667	Reference model uses no limit to the max RNA hairpin size (R^2 = 0.719, Error var = 6.68). These hypotheses use a setting in ViennaRNA that defines the maximum RNA hairpin size, where the closing base pair ij obeys: j - i = max_bp_span of N.
Maximum allowed size of RNA hairpins is 30	R	1014IC	0.686236	3549.5	3.75531	8.33462	23	1.24841	0.000245057	0.444375	0.656833
Maximum allowed size of RNA hairpins is 35	R	1014IC	0.689956	3527.8	3.71193	8.11122	23	1.21495	0.00110693	0.418632	0.675543
Maximum allowed size of RNA hairpins is 40	R	1014IC	0.702011	3877.3	3.21942	7.4979	23	1.12309	0.0339848	0.0947645	0.924512
Maximum allowed size of RNA hairpins is 45	R	1014IC	0.698394	4015.8	3.21575	7.75731	23	1.16194	0.00914826	0.0988295	0.921284
Maximum allowed size of RNA hairpins is 50	R	1014IC	0.708981	3678.7	3.21744	7.2503	23	1.086	0.0972519	0.105426	0.916049
Maximum allowed size of RNA hairpins is 75	R	1014IC	0.718958	3229.8	3.04048	6.68316	23	1.00105	0.493428	-0.0713592	0.943119
Maximum allowed size of RNA hairpins is 100	R	1014IC	0.715614	3106.6	2.94412	6.81272	23	1.02045	0.375069	-0.167721	0.86682
Partial (some) dangling free energies increase RNA structure prediction accuracy and are are an interaction that the ribosome must disrupt (dG_mRNA)	R	1014IC	0.69015	3287.4	2.6507	8.05679	23	1.2068	0.00156705	-0.547947	0.583802	Reference model uses no dangles by default.
Complete (all) dangling free energies increase RNA structure prediction accuracy and are are an interaction that the ribosome must disrupt (dG_mRNA)	R	1014IC	0.696699	3200.7	2.47788	7.68262	23	1.15075	0.0136359	-0.78891	0.430291
Nearest neighbor free energy parameters, Turner-2004, increase model accuracy over Andronescu-2007	R	1014IC	0.711166	1327.3	3.62884	7.78337	23	1.16584	0.00792749	0.506296	0.612706
Nearest neighbor free energy parameters, Turner-1999, increase model accuracy over Andronescu-2007	R	1014IC	0.719084	1220.8	3.64368	7.36407	23	1.10304	0.0615188	0.497849	0.618647
The portion of the 16S rRNA that binds to the mRNA in E. coli: 5'-GAUC-3'	R	Escherichia coli	0.466553	2419.44	4.41877	37.7974	23	4.04973	2.38031e-75	1.09888	0.272025	Reference model for the 16S rRNA hypotheses was the core aSD sequence: 5'-CCUCCU-3'
The portion of the 16S rRNA that binds to the mRNA in E. coli: 5'-AUCA-3'	R	Escherichia coli	0.44578	2566.4	5.36975	43.387	23	4.64862	2.96662e-89	1.7506	0.0802214
The portion of the 16S rRNA that binds to the mRNA in E. coli: 5'-UCAC-3'	R	Escherichia coli	0.408629	2277.22	9.7797	57.8867	23	6.20216	4.23756e-121	2.0082	0.0449435
The portion of the 16S rRNA that binds to the mRNA in E. coli: 5'-CACC-3'	R	Escherichia coli	0.511926	2314.6	3.93724	27.6242	23	2.95975	1.82389e-47	0.573729	0.566245
The portion of the 16S rRNA that binds to the mRNA in E. coli: 5'-ACCU-3'	R	Escherichia coli	0.566495	2586.32	3.668	19.1412	23	2.05085	2.01126e-22	0.284304	0.776218
The portion of the 16S rRNA that binds to the mRNA in E. coli: 5'-CCUC-3'	R	Escherichia coli	0.563365	3122.16	4.79101	19.6005	23	2.10006	9.05311e-24	1.1421	0.253603
The portion of the 16S rRNA that binds to the mRNA in E. coli: 5'-CUCC-3'	R	Escherichia coli	0.548728	3151.78	5.65307	22.0498	23	2.36249	4.96917e-31	1.4972	0.1346
The portion of the 16S rRNA that binds to the mRNA in E. coli: 5'-UCCU-3'	R	Escherichia coli	0.519822	3179.58	11.4752	27.4764	23	2.94391	4.88835e-47	1.64023	0.101361
The portion of the 16S rRNA that binds to the mRNA in E. coli: 5'-CCUU-3'	R	Escherichia coli	0.526129	3016.38	4.3582	25.2017	23	2.70019	2.19925e-40	0.88812	0.37462
The portion of the 16S rRNA that binds to the mRNA in E. coli: 5'-CUUA-3'	R	Escherichia coli	0.465483	2417.86	4.62056	37.8772	23	4.05828	1.48295e-75	1.25617	0.209265
The portion of the 16S rRNA that binds to the mRNA in E. coli: 5'-GAUCA-3'	R	Escherichia coli	0.459092	2630.92	4.64308	39.5726	23	4.23993	7.13029e-80	1.29774	0.194594
The portion of the 16S rRNA that binds to the mRNA in E. coli: 5'-AUCAC-3'	R	Escherichia coli	0.447882	2845.64	5.68143	42.973	23	4.60427	2.94089e-88	1.95567	0.0506941
The portion of the 16S rRNA that binds to the mRNA in E. coli: 5'-UCACC-3'	R	Escherichia coli	0.479718	2632.38	11.2336	34.8873	23	3.73794	1.03399e-67	1.83172	0.0673692
The portion of the 16S rRNA that binds to the mRNA in E. coli: 5'-CACCU-3'	R	Escherichia coli	0.573903	2763.07	3.93075	18.1825	23	1.94813	1.21986e-19	0.527382	0.598008
The portion of the 16S rRNA that binds to the mRNA in E. coli: 5'-ACCUC-3'	R	Escherichia coli	0.626865	3396.75	3.77383	12.6984	23	1.36055	1.45173e-05	0.343071	0.731594
The portion of the 16S rRNA that binds to the mRNA in E. coli: 5'-CCUCC-3'	R	Escherichia coli	0.625152	3688.09	4.7789	12.9477	23	1.38725	4.42027e-06	1.03503	0.300843
The portion of the 16S rRNA that binds to the mRNA in E. coli: 5'-CUCCU-3'	R	Escherichia coli	0.613375	3928.85	3.96049	13.9218	23	1.49162	2.9362e-08	0.481335	0.630351
The portion of the 16S rRNA that binds to the mRNA in E. coli: 5'-UCCUU-3'	R	Escherichia coli	0.534916	3385.31	11.2572	24.8475	23	2.66224	2.44084e-39	1.60294	0.109353
The portion of the 16S rRNA that binds to the mRNA in E. coli: 5'-CCUUA-3'	R	Escherichia coli	0.540898	3310.84	4.03862	22.6922	23	2.43131	6.08147e-33	0.628256	0.529934
The portion of the 16S rRNA that binds to the mRNA in E. coli: 5'-GAUCAC-3'	R	Escherichia coli	0.45952	2846.24	4.75848	39.4334	23	4.22502	1.59952e-79	1.38987	0.164788
The portion of the 16S rRNA that binds to the mRNA in E. coli: 5'-AUCACC-3'	R	Escherichia coli	0.508927	3286.56	5.306	28.1952	23	3.02093	4.09624e-49	1.63162	0.102976
The portion of the 16S rRNA that binds to the mRNA in E. coli: 5'-UCACCU-3'	R	Escherichia coli	0.532521	2863.63	11.0473	24.3584	23	2.60983	6.83142e-38	1.66941	0.0954339
The portion of the 16S rRNA that binds to the mRNA in E. coli: 5'-CACCUC-3'	R	Escherichia coli	0.640781	3253.87	3.64831	11.5388	23	1.2363	0.00196656	0.257221	0.797044
The portion of the 16S rRNA that binds to the mRNA in E. coli: 5'-ACCUCC-3'	R	Escherichia coli	0.680345	3803.1	3.42684	8.78727	23	0.941496	0.206057	0.0473392	0.962249
The portion of the 16S rRNA that binds to the mRNA in E. coli: 5'-CCUCCU*-3'	R	Escherichia coli	0.67273	4323.11	3.37463	9.33331	23	1	0	0	1
The portion of the 16S rRNA that binds to the mRNA in E. coli: 5'-CUCCUU-3'	R	Escherichia coli	0.622481	3622.09	3.79213	13.1602	23	1.41003	1.55249e-06	0.35172	0.725099
The portion of the 16S rRNA that binds to the mRNA in E. coli: 5'-UCCUUA-3'	R	Escherichia coli	0.54368	3645.53	9.07174	23.1408	23	2.47937	2.81384e-34	1.55957	0.119251
The portion of the 16S rRNA that binds to the mRNA in E. coli: 5'-GAUCACC-3'	R	Escherichia coli	0.510477	2892.87	4.8223	27.9403	23	2.99361	2.22507e-48	1.43945	0.150245
The portion of the 16S rRNA that binds to the mRNA in E. coli: 5'-AUCACCU-3'	R	Escherichia coli	0.561756	3213.65	4.82837	19.6786	23	2.10843	5.33309e-24	1.17196	0.241408
The portion of the 16S rRNA that binds to the mRNA in E. coli: 5'-UCACCUC-3'	R	Escherichia coli	0.585437	3293.12	13.9846	17.0193	23	1.8235	2.45466e-16	1.6559	0.0981539
The portion of the 16S rRNA that binds to the mRNA in E. coli: 5'-CACCUCC-3'	R	Escherichia coli	0.683002	3643.2	3.45908	8.62966	23	0.924609	0.143129	0.0777099	0.938069
The portion of the 16S rRNA that binds to the mRNA in E. coli: 5'-ACCUCCU-3'	A	Escherichia coli	0.703769	4157.14	3.83828	7.54707	23	0.808616	0.00194074	0.348138	0.727791
The portion of the 16S rRNA that binds to the mRNA in E. coli: 5'-CCUCCUU-3'	R	Escherichia coli	0.679682	4335.87	3.25149	8.96218	23	0.960236	0.290454	-0.112074	0.91078
The portion of the 16S rRNA that binds to the mRNA in E. coli: 5'-CUCCUUA-3'	R	Escherichia coli	0.630029	3786.27	3.26699	12.4341	23	1.33222	4.88494e-05	-0.109075	0.913159
The portion of the 16S rRNA that binds to the mRNA in E. coli: 5'-GAUCACCU-3'	R	Escherichia coli	0.562649	2918.85	4.08529	19.6639	23	2.10685	5.89215e-24	0.765797	0.443941
The portion of the 16S rRNA that binds to the mRNA in E. coli: 5'-AUCACCUC-3'	R	Escherichia coli	0.601032	3396.51	5.07067	15.0687	23	1.6145	4.37996e-11	1.18518	0.236167
The portion of the 16S rRNA that binds to the mRNA in E. coli: 5'-UCACCUCC-3'	R	Escherichia coli	0.62116	3518.39	11.9198	13.5073	23	1.44722	2.64895e-07	1.5602	0.119122
The portion of the 16S rRNA that binds to the mRNA in E. coli: 5'-CACCUCCU-3'	A	Escherichia coli	0.701255	3770.36	3.3885	7.66789	23	0.821562	0.00376897	0.0130604	0.989581
The portion of the 16S rRNA that binds to the mRNA in E. coli: 5'-ACCUCCUU-3'	A	Escherichia coli	0.706443	3988	3.64463	7.48739	23	0.802223	0.00137073	0.21239	0.831834
The portion of the 16S rRNA that binds to the mRNA in E. coli: 5'-CCUCCUUA-3'	R	Escherichia coli	0.679286	4151.21	3.22895	8.98707	23	0.962902	0.303508	-0.137354	0.890769
The portion of the 16S rRNA that binds to the mRNA in E. coli: 5'-GAUCACCUC-3'	R	Escherichia coli	0.59239	3022.41	4.16782	16.004	23	1.71472	1.51155e-13	0.832912	0.405045
The portion of the 16S rRNA that binds to the mRNA in E. coli: 5'-AUCACCUCC-3'	R	Escherichia coli	0.632857	3640.23	4.34557	12.1544	23	1.30226	0.000166526	0.802455	0.422421
The portion of the 16S rRNA that binds to the mRNA in E. coli: 5'-UCACCUCCU-3'	R	Escherichia coli	0.641218	4091.64	11.8519	12.0743	23	1.29367	0.000233892	1.5341	0.125414
The portion of the 16S rRNA that binds to the mRNA in E. coli: 5'-CACCUCCUU-3'	A	Escherichia coli	0.69901	3995.34	3.27479	7.85418	23	0.841521	0.00948321	-0.0967778	0.922916
The portion of the 16S rRNA that binds to the mRNA in E. coli: 5'-ACCUCCUUA**-3'	A	Escherichia coli	0.701082	3481.75	3.63931	7.91565	23	0.848107	0.0125354	0.215154	0.829678
The portion of the 16S rRNA that binds to the mRNA in E. coli: 5'-GAUCACCUCC-3'	R	Escherichia coli	0.618156	3338.71	3.66039	13.4133	23	1.43714	4.30762e-07	0.315076	0.752759
The portion of the 16S rRNA that binds to the mRNA in E. coli: 5'-AUCACCUCCU-3'	R	Escherichia coli	0.649115	4213.64	4.46318	10.9922	23	1.17774	0.013053	0.836592	0.402967
The portion of the 16S rRNA that binds to the mRNA in E. coli: 5'-UCACCUCCUU-3'	R	Escherichia coli	0.641103	4087.4	11.4256	12.3959	23	1.32814	5.79495e-05	1.53006	0.126411
The portion of the 16S rRNA that binds to the mRNA in E. coli: 5'-CACCUCCUUA-3'	R	Escherichia coli	0.692099	3152.14	3.39135	8.38555	23	0.898454	0.0726153	0.0158109	0.987387
The portion of the 16S rRNA that binds to the mRNA in E. coli: 5'-GAUCACCUCCU-3'	R	Escherichia coli	0.616586	4035.08	3.90314	13.6674	23	1.46437	1.14524e-07	0.551024	0.58171
The portion of the 16S rRNA that binds to the mRNA in E. coli: 5'-AUCACCUCCUU-3'	R	Escherichia coli	0.644978	4212.51	3.94748	11.4911	23	1.23119	0.00234735	0.50348	0.614702
The portion of the 16S rRNA that binds to the mRNA in E. coli: 5'-UCACCUCCUUA-3'	R	Escherichia coli	0.64057	3729.77	11.0637	12.8607	23	1.37794	6.72403e-06	1.52556	0.127525
The portion of the 16S rRNA that binds to the mRNA in E. coli: 5'-GAUCACCUCCUU-3'	R	Escherichia coli	0.606122	4221	3.91615	14.9398	23	1.6007	9.34674e-11	0.577706	0.563564
The portion of the 16S rRNA that binds to the mRNA in E. coli: 5'-AUCACCUCCUUA-3'	R	Escherichia coli	0.641353	4145.83	3.91778	12.1716	23	1.3041	0.000154706	0.492139	0.622694
The portion of the 16S rRNA that binds to the mRNA in E. coli: 5'-GAUCACCUCCUUA-3'	R	Escherichia coli	0.599531	3763.47	4.00124	16.1313	23	1.72836	6.8497e-14	0.671783	0.501845
The SD:aSD interaction does not occur in Bacteroides thetaiotaomicron, change in structure free energy predicts TIR	NT	Bacteroides thetaiotaomicron	0.488672	24.8	1.66171	3.24277	0	1.05039	0.384988	0.465006	0.642406	Reference model for the Bacteroides hypotheses was RBS Calculator v2.1 with the 9 nt 16S rRNA sequence (R^2 = 0.51, MC =24.7, Error var = 3.09)
The portion of the 16S rRNA that binds to the mRNA in Bacteroides: 5'-GAACACCUCCUUU-3'	R	Bacteroides thetaiotaomicron	0.395864	20.7	1.52795	3.82961	0	1.24048	0.100186	0.318094	0.750653
Optimal aligned spacer length is 2 nucleotides in E. coli	R	Escherichia coli	0.629924	3302.3	2.82926	12.7543	23	1.61127	5.2327e-11	-0.790183	0.42961
Optimal aligned spacer length is 3 nucleotides in E. coli	R	Escherichia coli	0.656111	2672.5	2.92597	10.6992	23	1.35165	2.13712e-05	-0.690313	0.490156
Optimal aligned spacer length is 4 nucleotides in E. coli	A	Escherichia coli	0.68249	3776.7	3.31991	8.95927	23	1.13184	0.0460392	-0.27024	0.787017
Optimal aligned spacer length is 5 nucleotides in E. coli	A	Escherichia coli	0.701082	3481.8	3.63931	7.91565	23	1	0	0	1
Optimal aligned spacer length is 6 nucleotides in E. coli	R	Escherichia coli	0.698753	3290.7	3.21638	7.94271	23	1.00342	0.481477	-0.366002	0.714422
Optimal aligned spacer length is 7 nucleotides in E. coli	R	Escherichia coli	0.624047	4384.8	4.26169	13.7248	23	1.73388	4.96456e-14	0.549841	0.582525
Optimal aligned spacer length is 8 nucleotides in E. coli	R	Escherichia coli	0.582027	2703.2	4.90569	18.5955	23	2.34921	1.16194e-30	1.08217	0.279369
Optimal aligned spacer length is 2 nucleotides in B. subtilis	R	Bacillus subtilis	0.516705	1858.32	1.76652	23.5544	0	2.49189	0.000266812	-0.0739946	0.941138
Optimal aligned spacer length is 3 nucleotides in B. subtilis	R	Bacillus subtilis	0.608501	1593.84	1.6933	12.2245	0	1.29326	0.160962	-0.30575	0.760328
Optimal aligned spacer length is 4 nucleotides in B. subtilis	R	Bacillus subtilis	0.628124	1678.29	1.69713	10.7464	0	1.13689	0.31042	-0.291627	0.771078
Optimal aligned spacer length is 5 nucleotides in B. subtilis	A	Bacillus subtilis	0.644742	1554.43	1.79033	9.45244	0	1	0	0	1
Optimal aligned spacer length is 6 nucleotides in B. subtilis	A	Bacillus subtilis	0.702575	1478.54	1.86872	6.43221	0	0.680481	0.0694099	0.231328	0.817455
Optimal aligned spacer length is 7 nucleotides in B. subtilis	R	Bacillus subtilis	0.703168	1631.06	1.76889	6.48088	0	0.68563	0.0733364	-0.0641278	0.948975
Optimal aligned spacer length is 8 nucleotides in B. subtilis	R	Bacillus subtilis	0.64754	1445.88	1.80844	9.42933	0	0.997555	0.496233	0.0525029	0.958216
B. subtilis has optimal spacing length of 6 with adjusted spacing parameters for dG_spacing	A	Bacillus subtilis	0.762257	1801.1	1.81025	4.41005	0	0.466551	0.00182984	0.0614577	0.951097	Reference model was RBS Calculator v2.1 with optimal_spacing=5
Ribosome platform is more accomadating for structured standby sites in B. subtilis (i.e. weaker distortion energy penalty, less sliding penalty, and is more flexible to accomodate mRNAs with inaccessible standby sites)	A	Bacillus subtilis	0.803504	2547.5	1.86897	3.57592	0	0.378306	0.000116956	0.160743	0.872646	Reference model was RBS Calculator v2.1 with updated B subtilis spacing parameters (R^2 = 0.762)

## Sheet: Sheet2
RBSCalc_s=2	1858.32
RBSCalc_s=3	1593.84
RBSCalc_s=4	1678.29
RBSCalc_s=5	1554.43
RBSCalc_s=6	1478.54
RBSCalc_s=7	1631.06
RBSCalc_s=8	1445.88
